# Supplementary material for: 3D porous cementitious electrolytes with “stream-reservoir” ionic channels for high multifunctional performance structural supercapacitors
Source: Royal Society of Chemistry journal article supplement (doi:10.1039/d3ta05853k), 2023-12-15
Supplement: d3ta05853k1.pdf [file d3ta05853k1.pdf]

## Supporting Information

### 3D Porous cementitious electrolyte with “stream-reservoir” ionic channels for high multifunctional performance structural supercapacitors

*Muyang Shi, Dong Zhang\**

Key Laboratory of Advanced Civil Engineering Materials, Ministry of Education,  
School of Materials Science and Engineering, Tongji University, Shanghai 201804,  
PR China

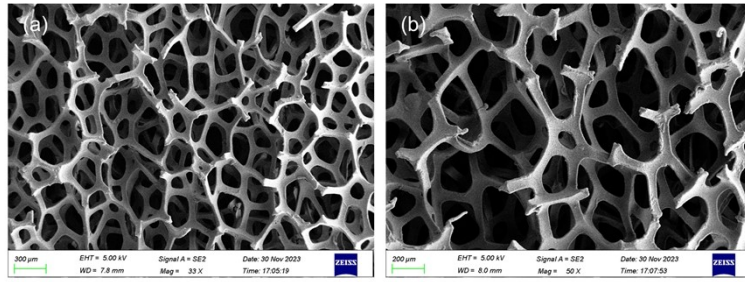

**Figure S1.** The SEM images of nickel foam.

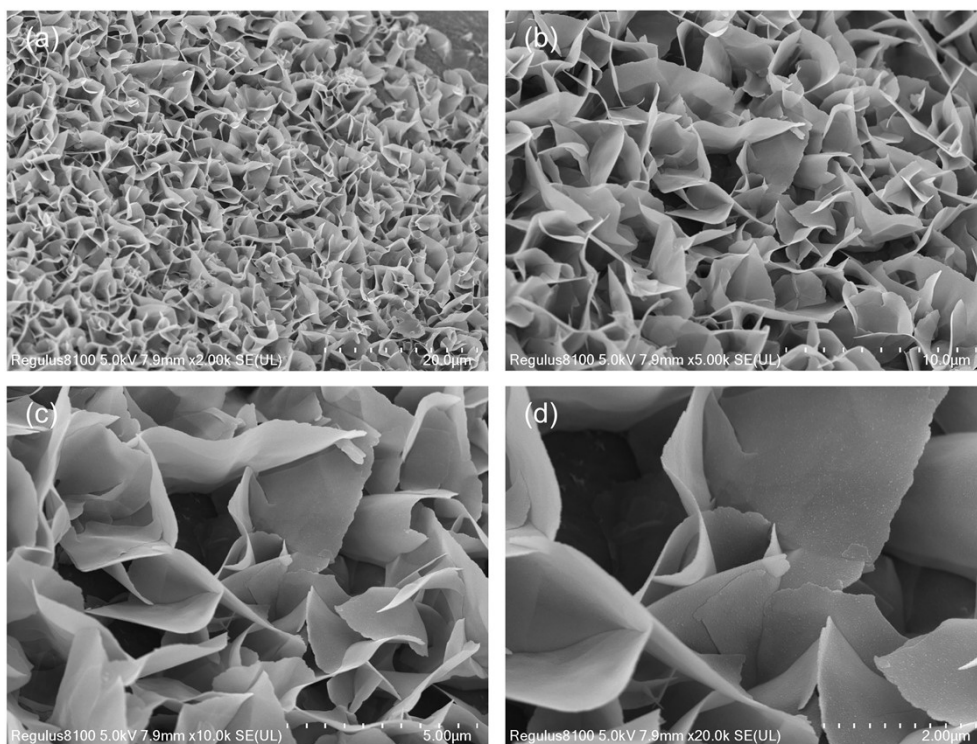

**Figure S2.** SEM images of rGO.

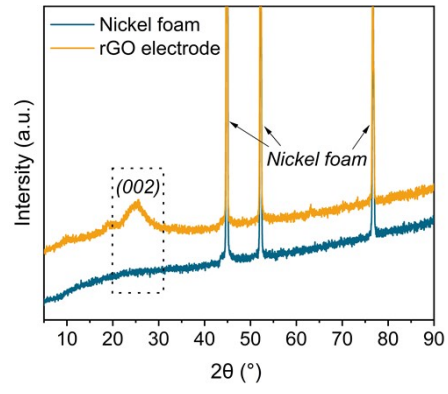

**Figure S3.** XRD patterns of the nickel foam and rGO electrodes.

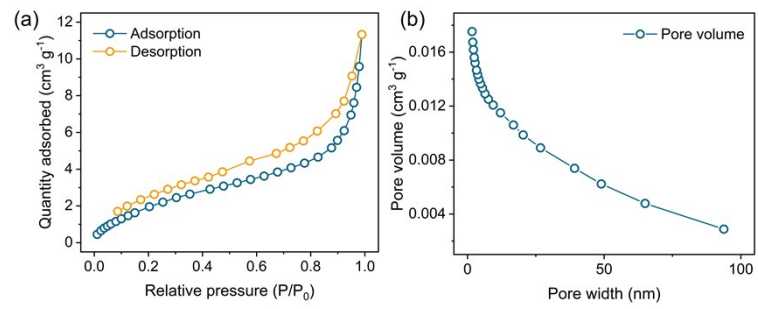

**Figure S4.** BET test of the rGO foam electrode. (a) N<sub>2</sub> adsorption/desorption isotherms.

(b) corresponding pore size distributions.

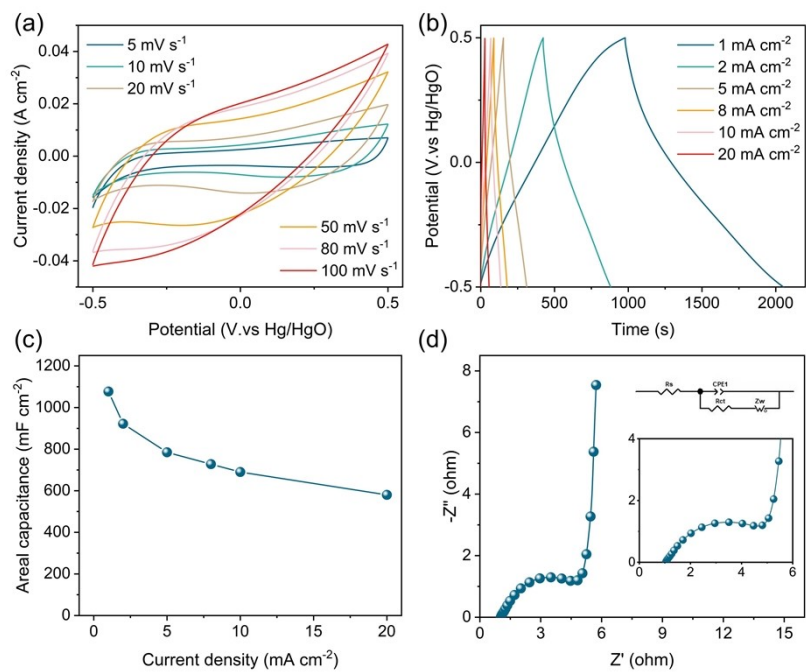

**Figure S5.** (a) CV curves at various scan rates and (b) GCD curves at various current densities for rGO. (c) The areal capacitance of rGO under various current densities. (d) Nyquist plots of rGO.

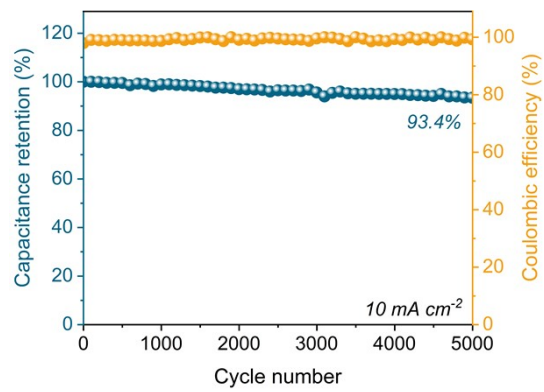

**Figure S6.** Cyclic performance of the rGO.

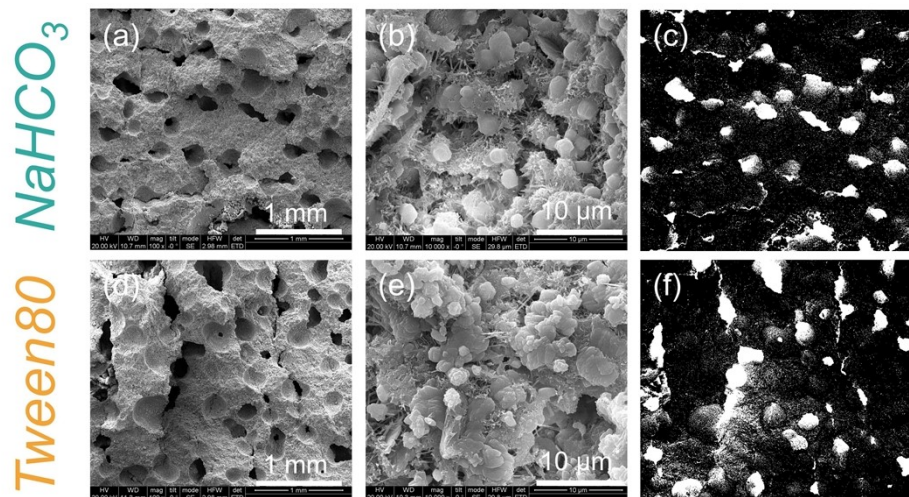

**Figure S7.** High and low magnifications of SEM images of cementitious electrolytes showing (a, b)  $\text{NaHCO}_3$ -PCE and (d, e) Tween80-PCE. Processing SEM images of cementitious electrolytes with different foaming agent types: (c)  $\text{NaHCO}_3$ -PCE and (f) Tween80-PCE.



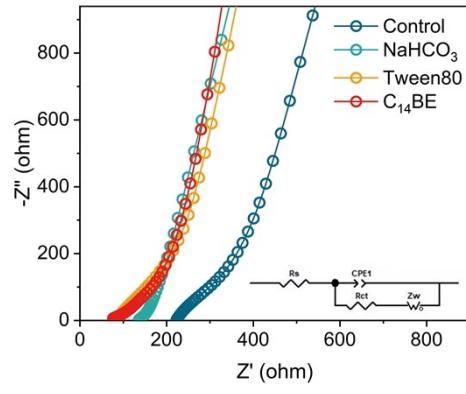

**Figure S8.** EIS curves of control/NaHCO<sub>3</sub>/Tween80/C<sub>14</sub>BE-PCE.

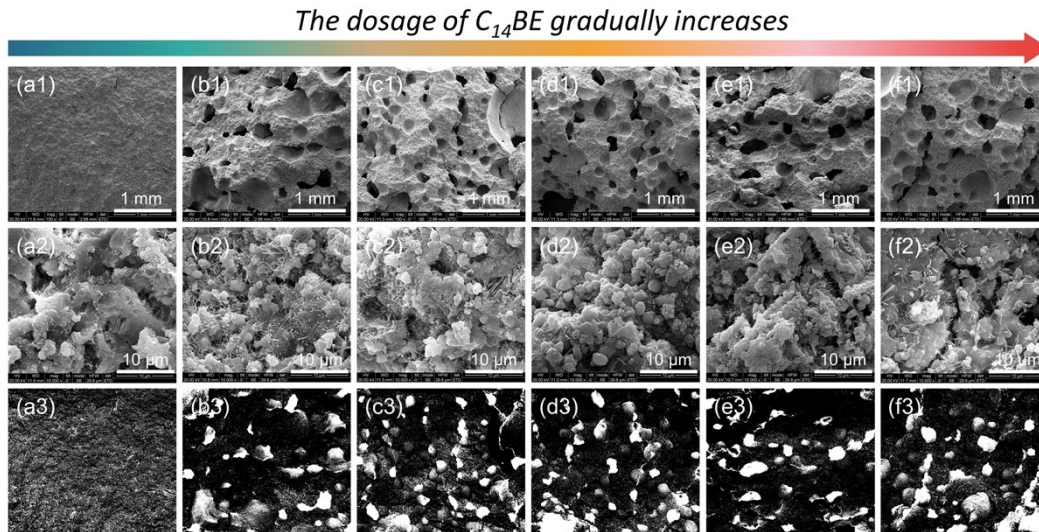

**Figure S9.** Low and high magnification SEM images of cementitious electrolytes with various contents of  $C_{14}BE$ : (a1, a2) 0 wt%; (b1, b2) 1 wt%; (c1, c2) 2 wt%; (d1, d2) 3 wt%; (e1, e2) 4 wt%; (f1, f2) 5 wt%. Processing SEM images of cementitious electrolytes with various contents of  $C_{14}BE$ : (a3) 0 wt%; (b3) 1 wt%; (c3) 2 wt%; (d3) 3 wt%; (e3) 4 wt%; (f3) 5 wt%.

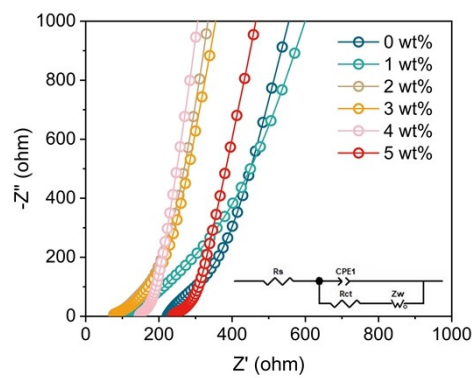

**Figure S10.** EIS curves of a series of C<sub>14</sub>BE-PCE.

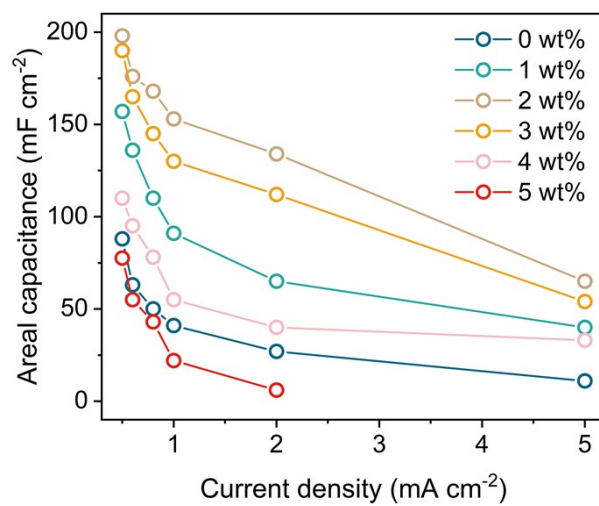

**Figure S11.** The areal capacitance of the different C<sub>14</sub>BE-PCE-based SSCs under various current densities.

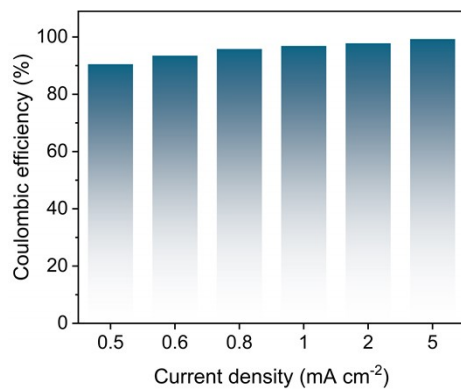

**Figure S12.** Coulombic efficiency of C<sub>14</sub>BE-PCE-based redox-active SSC vs. the current density.

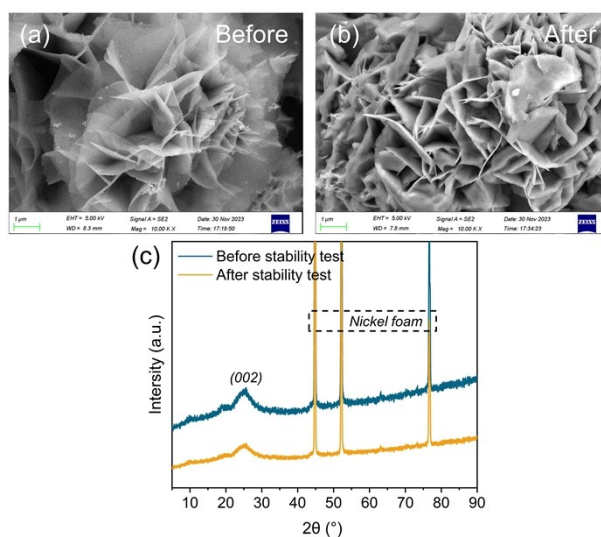

**Figure S13.** (a) The SEM image of rGO before cycling test. (b) The SEM image of rGO after cycling test. (c) XRD pattern of rGO before and after cycling test.

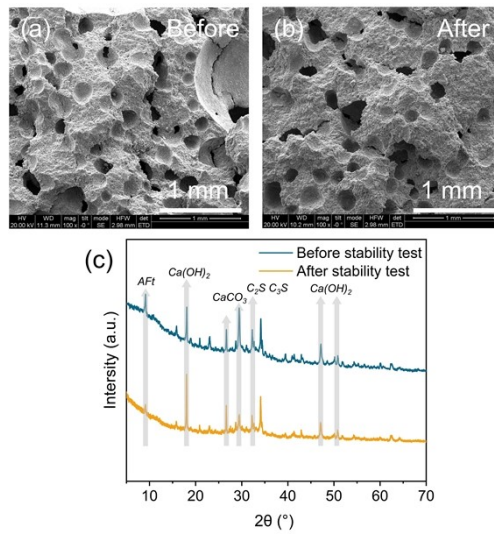

**Figure S14.** (a) The SEM image of C<sub>14</sub>BE-PCE before cycling test. (b) The SEM image of C<sub>14</sub>BE-PCE after cycling test. (c) XRD pattern of C<sub>14</sub>BE-PCE before and after cycling test.

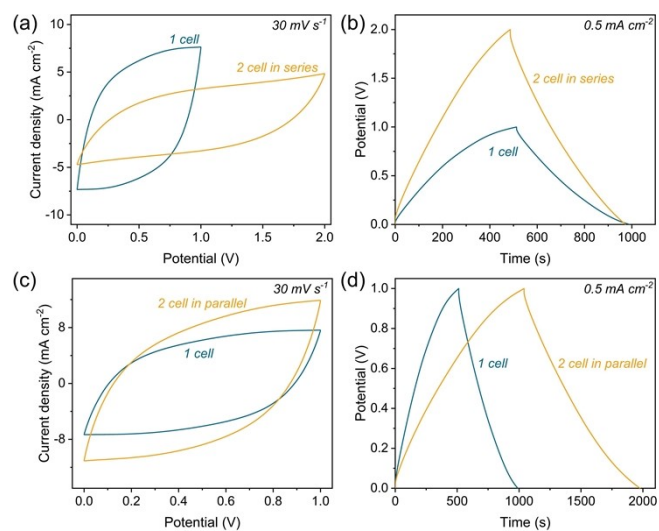

**Figure S15.** Electrochemical measurement on multiple SSCs connected in series and parallel. (a) CV profiles of one and two cells in series with a scan rate of 30 mV s<sup>-1</sup>. (b) GCD curves of one and two cells in series with a current density of 0.5 mA cm<sup>-2</sup>. (c) CV profiles of one and two cells in parallel with the scan rate of 30 mV s<sup>-1</sup>. (d) GCD curves of one and two cells in parallel with a current density of 0.5 mA cm<sup>-2</sup>.



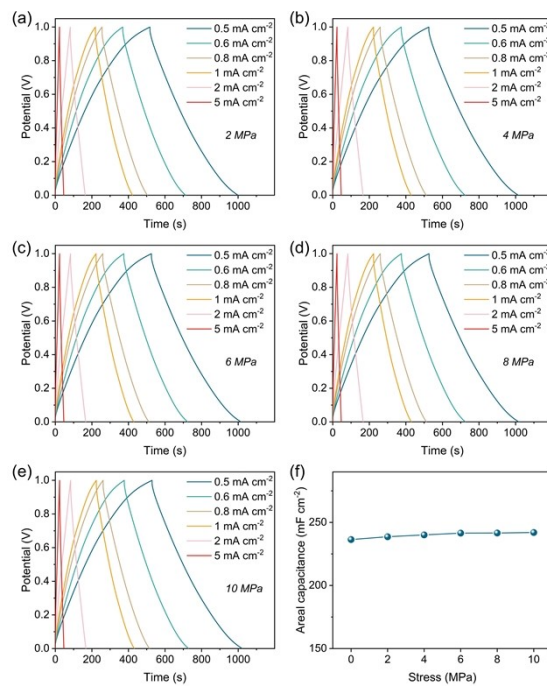

**Figure S16.** GCD curves of the C<sub>14</sub>BE-PCE-based redox-active SSC at (a) 2 MPa, (b) 4 MPa, (c) 6 MPa, (d) 8 MPa, and (e) 10 MPa. (f) GCD comparison of the SSC at different stresses at a current density of 0.5 mA cm<sup>-2</sup>.

| Electrolyte composition  | Ionic conductivity (mS cm <sup>-1</sup> ) | Compressive strength (MPa) | Ref              |
|--------------------------|-------------------------------------------|----------------------------|------------------|
| polyMIPE                 | 1.9                                       | 20                         | 1                |
| PEO-BMITFSI              | 0.1                                       | 0.4                        | 2                |
| Epoxy-LiClO <sub>4</sub> | 1.58                                      | 1.45                       | 3                |
| LATP- PVDF               | 1.64                                      | 14.2                       | 4                |
| PAA-aluminate cement     | 8.2                                       | 37.2                       | 5                |
| Portland cement          | 2.13                                      | 9.85                       | 6                |
| PVA-Portland cement      | 5.65                                      | 8.74                       | 7                |
| PEO-Portland cement      | 4.75                                      | 22.29                      | 8                |
| C <sub>14</sub> BE-PCE   | <b>13.1</b>                               | <b>29.5</b>                | <b>This work</b> |

**Table S1.** Comparison of solid electrolyte of previous studies and this work

## References

- 1 V. Tu, L. E. Asp, N. Shirshova, F. Larsson, K. Runesson and R. Jänicke, *Multifunct. Mater.*, 2020, **3**, 025001.
- 2 S. Leijonmarck, T. Carlson, G. Lindbergh, L. E. Asp, H. Maples and A. Bismarck, *Composites Science and Technology*, 2013, **89**, 149–157.
- 3 S.-H. Bae, C. Jeon, S. Oh, C.-G. Kim, M. Seo and I.-K. Oh, *Carbon*, 2018, **139**, 10–20.
- 4 Y. Jin, C. Liu, Z. Jia, X. Zong, D. Li, M. Fu, J. Wei and Y. Xiong, *Journal of Alloys and Compounds*, 2021, **874**, 159890.
- 5 J. X. Tu, X. X. Chen, X. B. Xiong, Y. Chen, J. Ma, H. Y. Cao and A. J. Li, *Materials Today Chemistry*, 2023, **28**, 101365.
- 6 J. Zhang, J. Xu and D. Zhang, *J. Electrochem. Soc.*, 2016, **163**, E83–E87.
- 7 C. Xu and D. Zhang, *Journal of Composite Materials*, 2021, **55**, 1359–1369.
- 8 C. Fang and D. Zhang, *Electrochimica Acta*, 2022, **401**, 139491.
